# Supplementary material for: Isotope-coded protein label based quantitative proteomic analysis reveals significant up-regulation of apolipoprotein A1 and ovotransferrin in the myopic chick vitreous
Source: PubMed Central journal article supplement (PMC5627271; doi:10.1038/s41598-017-12650-7), 2017-10-04

|                             | Gallus gallus (REF) | Client Text Box Input (▼ Hierarchy NEW! ?) |          |                 |     |          |
|-----------------------------|---------------------|--------------------------------------------|----------|-----------------|-----|----------|
| PANTHER Protein Class       | #                   | #                                          | expected | Fold Enrichment | +/- | P value  |
| Hsp90 family chaperone      | 4                   | 3                                          | .07      | 40.68           | +   | 1.25E-02 |
| ↳chaperone                  | 129                 | 10                                         | 2.38     | 4.20            | +   | 3.41E-02 |
| cysteine protease inhibitor | 7                   | 4                                          | .13      | 30.99           | +   | 2.04E-03 |
| amino acid kinase           | 6                   | 3                                          | .11      | 27.12           | +   | 4.10E-02 |
| anion channel               | 25                  | 6                                          | .46      | 13.02           | +   | 1.71E-03 |
| transfer/carrier protein    | 243                 | 15                                         | 4.48     | 3.35            | +   | 1.16E-02 |
| Unclassified                | 7974                | 116                                        | 147.03   | .79             | -   | 0.00E00  |
| transcription factor        | 934                 | 3                                          | 17.22    | < 0.2           | -   | 4.65E-03 |

Supplementary Table S2

|                                                                           | Gallus gallus (REF) | Client Text Box Input (▼ Hierarchy NEW! ?) |          |                 |     |          |
|---------------------------------------------------------------------------|---------------------|--------------------------------------------|----------|-----------------|-----|----------|
| Reactome pathways                                                         | #                   | #                                          | expected | Fold Enrichment | +/- | P value  |
| Gluconeogenesis                                                           | 17                  | 10                                         | .31      | 31.90           | +   | 2.31E-09 |
| ↳Carbohydrate metabolism                                                  | 25                  | 10                                         | .46      | 21.69           | +   | 9.62E-08 |
| ↳Metabolism                                                               | 50                  | 12                                         | .92      | 13.02           | +   | 3.91E-07 |
| Gluconeogenesis                                                           | 20                  | 11                                         | .37      | 29.83           | +   | 3.62E-10 |
| ↳Glucose metabolism                                                       | 52                  | 12                                         | .96      | 12.52           | +   | 6.06E-07 |
| ↳Metabolism of carbohydrates                                              | 181                 | 16                                         | 3.34     | 4.79            | +   | 5.40E-04 |
| ↳Metabolism                                                               | 1245                | 61                                         | 22.96    | 2.66            | +   | 2.97E-09 |
| Translocation of GLUT4 to the plasma membrane                             | 12                  | 6                                          | .22      | 27.12           | +   | 1.82E-04 |
| ↳Membrane Trafficking                                                     | 296                 | 18                                         | 5.46     | 3.30            | +   | 1.86E-02 |
| ↳Vesicle-mediated transport                                               | 319                 | 23                                         | 5.88     | 3.91            | +   | 6.08E-05 |
| Glycolysis                                                                | 15                  | 7                                          | .28      | 25.31           | +   | 2.55E-05 |
| Glycolysis                                                                | 20                  | 8                                          | .37      | 21.69           | +   | 7.91E-06 |
| Formation of ATP by chemiosmotic coupling                                 | 17                  | 5                                          | .31      | 15.95           | +   | 2.66E-02 |
| TP53 Regulates Metabolic Genes                                            | 34                  | 7                                          | .63      | 11.17           | +   | 5.82E-03 |
| Lipid digestion, mobilization, and transport                              | 61                  | 11                                         | 1.12     | 9.78            | +   | 3.96E-05 |
| Platelet degranulation                                                    | 102                 | 18                                         | 1.88     | 9.57            | +   | 2.10E-09 |
| ↳Response to elevated platelet cytosolic Ca2+                             | 106                 | 18                                         | 1.95     | 9.21            | +   | 3.93E-09 |
| ↳Platelet activation, signaling and aggregation                           | 200                 | 22                                         | 3.69     | 5.97            | +   | 6.23E-08 |
| ↳Hemostasis                                                               | 330                 | 30                                         | 6.08     | 4.93            | +   | 1.87E-09 |
| Degradation of the extracellular matrix                                   | 62                  | 9                                          | 1.14     | 7.87            | +   | 4.24E-03 |
| ↳Extracellular matrix organization                                        | 159                 | 23                                         | 2.93     | 7.85            | +   | 9.27E-11 |
| Nonsense Mediated Decay (NMD) enhanced by the Exon Junction Complex (EJC) | 80                  | 9                                          | 1.48     | 6.10            | +   | 3.16E-02 |
| ↳Nonsense-Mediated Decay (NMD)                                            | 80                  | 9                                          | 1.48     | 6.10            | +   | 3.16E-02 |
| Unclassified                                                              | 10480               | 119                                        | 193.24   | .62             | -   | 0.00E00  |

Supplementary Table S3

## Appendix 2. Mascot search results of four changed proteins by tandem MS. Protein information of identification including sequence coverage, matched peptides and error are shown.

### 1. Apolipoprotein A1

#### **MASCOT** Mascot Search Results

##### Protein View

Match to: **IP100580765** Score: **118**

Tax\_Id=9031 Gene\_Symbol=APOA1 Apolipoprotein A-I

Nominal mass (M<sub>r</sub>): **30661**; Calculated pI value: **5.58**

NCBI BLAST search of [IP100580765](#) against nr

Unformatted [sequence string](#) for pasting into other applications

Fixed modifications: Carbamidomethyl (C)

Variable modifications: ICPL\_0 (K), ICPL\_0 (Protein N-term), ICPL\_6 (K), ICPL\_6 (Protein N-term), Oxidation (M)

Cleavage by Trypsin+GluC: cuts C-term side of ER unless next residue is P

Sequence Coverage: **51%**

Matched peptides shown in **Bold Red**

```

1 MRGLVLTAV LFLTGTQARS FWQHDEPQTP LDRIRDMVDV YLETVKASGK
51 DAIAQFESSA V GKQLDLKLA DNLDTLSAAA AKLREDMAPY YKEVREMMLK
101 DTEALRAELT KDLEEVKEKI RPFLDQFSAK WTEELEQYRQ RLTPVAQELK
151 ELTRKQVELM QAKLTPVAEE ARDLRLRGHVE ELRKNLAPYS DELKQKLSQK
201 LEEIREKGIP QASEYQAKVM EQLSNLREKM TPLVQEFFRER LTPYAENLKN
251 RLISFLDELQ KSAV
    
```

Show predicted peptides also

Sort Peptides By  Residue Number  Increasing Mass  Decreasing Mass

| Start - End | Observed  | Mr (expt) | Mr (calc) | Delta   | Miss | Sequence                                                                         |
|-------------|-----------|-----------|-----------|---------|------|----------------------------------------------------------------------------------|
| 20 - 33     | 878.3630  | 1754.7114 | 1754.8013 | -0.0898 | 0    | R.SFWQHDEPQTP <del>L</del> DR.I ( <a href="#">Ions score 26</a> )                |
| 20 - 33     | 878.4344  | 1754.8542 | 1754.8013 | 0.0530  | 0    | R.SFWQHDEPQTP <del>L</del> DR.I ( <a href="#">Ions score 29</a> )                |
| 20 - 33     | 586.2846  | 1755.8320 | 1754.8013 | 1.0307  | 0    | R.SFWQHDEPQTP <del>L</del> DR.I ( <a href="#">Ions score 17</a> )                |
| 34 - 43     | 626.8140  | 1251.6134 | 1251.6169 | -0.0035 | 1    | R.IRDMVDVYLE.T ( <a href="#">Ions score 25</a> )                                 |
| 34 - 43     | 626.8535  | 1251.6924 | 1251.6169 | 0.0755  | 1    | R.IRDMVDVYLE.T ( <a href="#">Ions score 19</a> )                                 |
| 34 - 43     | 626.8631  | 1251.7116 | 1251.6169 | 0.0947  | 1    | R.IRDMVDVYLE.T ( <a href="#">Ions score 23</a> )                                 |
| 44 - 57     | 558.8262  | 1673.4568 | 1673.8049 | -0.3482 | 0    | E.TVKASGKDAIAQFE.S 2 ICPL_0 (K) ( <a href="#">Ions score 23</a> )                |
| 44 - 57     | 837.9422  | 1673.8698 | 1673.8049 | 0.0649  | 0    | E.TVKASGKDAIAQFE.S 2 ICPL_0 (K) ( <a href="#">Ions score 26</a> )                |
| 44 - 57     | 837.9459  | 1673.8772 | 1673.8049 | 0.0723  | 0    | E.TVKASGKDAIAQFE.S 2 ICPL_0 (K) ( <a href="#">Ions score 45</a> )                |
| 44 - 57     | 843.9757  | 1685.9368 | 1685.8452 | 0.0917  | 0    | E.TVKASGKDAIAQFE.S 2 ICPL_6 (K) ( <a href="#">Ions score 23</a> )                |
| 44 - 57     | 844.0061  | 1685.9976 | 1685.8452 | 0.1525  | 0    | E.TVKASGKDAIAQFE.S 2 ICPL_6 (K) ( <a href="#">Ions score 33</a> )                |
| 44 - 57     | 844.0061  | 1685.9976 | 1685.8452 | 0.1525  | 0    | E.TVKASGKDAIAQFE.S 2 ICPL_6 (K) ( <a href="#">Ions score 59</a> )                |
| 44 - 57     | 563.0185  | 1686.0337 | 1685.8452 | 0.1885  | 0    | E.TVKASGKDAIAQFE.S 2 ICPL_6 (K) ( <a href="#">Ions score 20</a> )                |
| 44 - 57     | 563.2810  | 1686.8212 | 1685.8452 | 0.9760  | 0    | E.TVKASGKDAIAQFE.S 2 ICPL_6 (K) ( <a href="#">Ions score 14</a> )                |
| 97 - 103    | 1033.3722 | 1032.3649 | 1032.4682 | -0.1033 | 0    | E.MWLKDE.T.A ICPL_6 (K) ( <a href="#">Ions score 10</a> )                        |
| 97 - 103    | 517.2096  | 1032.4046 | 1032.4682 | -0.0635 | 0    | E.MWLKDE.T.A ICPL_6 (K) ( <a href="#">Ions score 22</a> )                        |
| 119 - 134   | 735.7217  | 2204.1433 | 2204.0691 | 0.0742  | 1    | E.KIRPF <del>L</del> DQFSAKWTEE.L 2 ICPL_0 (K) ( <a href="#">Ions score 14</a> ) |
| 140 - 148   | 521.6870  | 1041.3594 | 1040.5614 | 0.7980  | 1    | R.QRLTPVAQE.L ( <a href="#">Ions score 13</a> )                                  |
| 140 - 148   | 521.7384  | 1041.4622 | 1040.5614 | 0.9008  | 1    | R.QRLTPVAQE.L ( <a href="#">Ions score 21</a> )                                  |
| 142 - 151   | 616.8538  | 1231.6930 | 1231.6448 | 0.0482  | 1    | R.LTPVAQELKE.L ICPL_0 (K) ( <a href="#">Ions score 12</a> )                      |
| 142 - 151   | 616.8538  | 1231.6930 | 1231.6448 | 0.0482  | 1    | R.LTPVAQELKE.L ICPL_0 (K) ( <a href="#">Ions score 12</a> )                      |
| 142 - 151   | 619.8332  | 1237.6518 | 1237.6650 | -0.0131 | 1    | R.LTPVAQELKE.L ICPL_6 (K) ( <a href="#">Ions score 14</a> )                      |
| 142 - 151   | 619.8332  | 1237.6518 | 1237.6650 | -0.0131 | 1    | R.LTPVAQELKE.L ICPL_6 (K) ( <a href="#">Ions score 15</a> )                      |
| 152 - 158   | 528.1683  | 1054.3220 | 1054.5447 | -0.2227 | 0    | E.LTRKQVE.L 2 ICPL_0 (K) ( <a href="#">Ions score 19</a> )                       |
| 152 - 158   | 528.1721  | 1054.3296 | 1054.5447 | -0.2151 | 0    | E.LTRKQVE.L 2 ICPL_0 (K) ( <a href="#">Ions score 24</a> )                       |
| 152 - 158   | 534.1775  | 1066.3404 | 1066.5850 | -0.2445 | 0    | E.LTRKQVE.L 2 ICPL_6 (K) ( <a href="#">Ions score 11</a> )                       |
| 159 - 170   | 717.9096  | 1433.8046 | 1433.7224 | 0.0822  | 1    | E.LMQAKLTPVAEE.A ICPL_0 (K) ( <a href="#">Ions score 29</a> )                    |
| 159 - 170   | 720.8424  | 1439.6702 | 1439.7426 | -0.0723 | 1    | E.LMQAKLTPVAEE.A ICPL_6 (K) ( <a href="#">Ions score 29</a> )                    |
| 159 - 170   | 720.8846  | 1439.7546 | 1439.7426 | 0.0121  | 1    | E.LMQAKLTPVAEE.A ICPL_6 (K) ( <a href="#">Ions score 38</a> )                    |
| 184 - 192   | 571.2176  | 1140.4206 | 1140.5087 | -0.0881 | 0    | R.KNLAPYSDE.L ICPL_0 (K) ( <a href="#">Ions score 17</a> )                       |
| 184 - 192   | 571.2854  | 1140.5562 | 1140.5087 | 0.0475  | 0    | R.KNLAPYSDE.L ICPL_0 (K) ( <a href="#">Ions score 7</a> )                        |
| 184 - 194   | 470.8346  | 1409.4820 | 1409.6939 | -0.2119 | 1    | R.KNLAPYSDEL.R.Q ICPL_0 (K) ( <a href="#">Ions score 25</a> )                    |
| 184 - 194   | 705.8726  | 1409.7306 | 1409.6939 | 0.0368  | 1    | R.KNLAPYSDEL.R.Q ICPL_0 (K) ( <a href="#">Ions score 37</a> )                    |
| 184 - 194   | 705.8726  | 1409.7306 | 1409.6939 | 0.0368  | 1    | R.KNLAPYSDEL.R.Q ICPL_0 (K) ( <a href="#">Ions score 36</a> )                    |
| 184 - 194   | 705.8726  | 1409.7306 | 1409.6939 | 0.0368  | 1    | R.KNLAPYSDEL.R.Q ICPL_0 (K) ( <a href="#">Ions score 42</a> )                    |
| 184 - 194   | 705.8726  | 1409.7306 | 1409.6939 | 0.0368  | 1    | R.KNLAPYSDEL.R.Q ICPL_0 (K) ( <a href="#">Ions score 46</a> )                    |
| 184 - 194   | 708.8614  | 1415.7082 | 1415.7140 | -0.0058 | 1    | R.KNLAPYSDEL.R.Q ICPL_6 (K) ( <a href="#">Ions score 13</a> )                    |
| 195 - 203   | 604.7484  | 1207.4822 | 1206.6244 | 0.8578  | 1    | R.QKLSQKLEE.I ICPL_0 (K) ( <a href="#">Ions score 11</a> )                       |
| 195 - 203   | 662.8150  | 1323.6154 | 1323.6861 | -0.0707 | 1    | R.QKLSQKLEE.I 2 ICPL_6 (K) ( <a href="#">Ions score 17</a> )                     |
| 195 - 203   | 662.8565  | 1323.6984 | 1323.6861 | 0.0123  | 1    | R.QKLSQKLEE.I 2 ICPL_6 (K) ( <a href="#">Ions score 6</a> )                      |
| 206 - 214   | 535.2317  | 1068.4488 | 1068.5183 | -0.0694 | 1    | R.EKGIPQASE.Y ICPL_6 (K) ( <a href="#">Ions score 18</a> )                       |
| 215 - 221   | 487.1980  | 972.3814  | 972.4375  | -0.0560 | 0    | E.YQAKVME.Q ICPL_0 (K) ( <a href="#">Ions score 21</a> )                         |

|           |          |           |           |         |   |               |            |                                   |
|-----------|----------|-----------|-----------|---------|---|---------------|------------|-----------------------------------|
| 215 - 221 | 490.1566 | 978.2986  | 978.4576  | -0.1590 | 0 | E.YQAKVME.Q   | ICPL_6 (K) | ( <a href="#">Ions score 25</a> ) |
| 215 - 221 | 490.1566 | 978.2986  | 978.4576  | -0.1590 | 0 | E.YQAKVME.Q   | ICPL_6 (K) | ( <a href="#">Ions score 31</a> ) |
| 215 - 221 | 979.3578 | 978.3505  | 978.4576  | -0.1071 | 0 | E.YQAKVME.Q   | ICPL_6 (K) | ( <a href="#">Ions score 15</a> ) |
| 228 - 236 | 593.3112 | 1184.6078 | 1184.5843 | 0.0236  | 1 | R.EKMTPLVQE.F | ICPL_6 (K) | ( <a href="#">Ions score 16</a> ) |

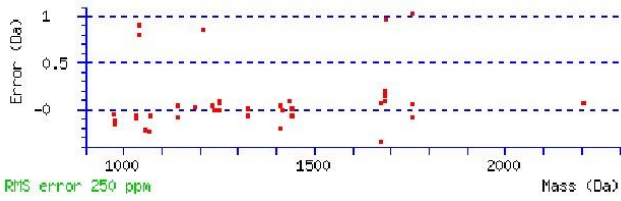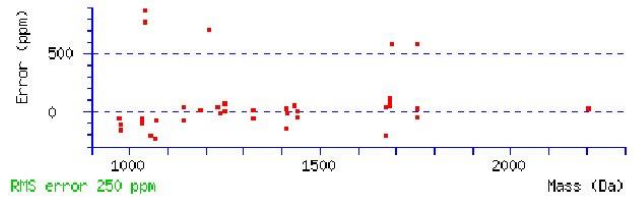

Mascot: <http://www.matrixscience.com/>

## 2. Cystatin

# **MATRIX** Mascot Search Results

### Protein View

Match to: **IPI00576782** Score: **211**  
**Tax\_Id=9031 Gene\_Symbol=CST3 Cystatin**

Nominal mass ( $M_r$ ): **15562**; Calculated pI value: **7.60**  
 NCBI BLAST search of [IPI00576782](#) against nr  
 Unformatted [sequence string](#) for pasting into other applications

Fixed modifications: Carbamidomethyl (C)  
 Variable modifications: ICPL\_0 (K), ICPL\_0 (Protein N-term), ICPL\_6 (K), ICPL\_6 (Protein N-term), Oxidation (M)  
 Cleavage by Trypsin+GluC: cuts C-term side of ER unless next residue is P  
 Sequence Coverage: **41%**

Matched peptides shown in **Bold Red**

**1** MAGARGCVVL LAAALMLVGA VLGSEDRSRL **LGAPVPVDEN** DEGLQRALQF  
**51** **AMAEYNR**ASN DKYSSRVVRV ISAKR**QLVSG IKYILQVE**IG **RTTCPKSSGD**  
**101** **LQSCFEHDEP** EMAKYTTCTF VVYSIPWLNQ IKLLESKCQ

Show predicted peptides also

Sort Peptides By  Residue Number  Increasing Mass  Decreasing Mass

| Start - End | Observed  | Mr(expt)  | Mr(calc)  | Delta   | Miss | Sequence                                           |
|-------------|-----------|-----------|-----------|---------|------|----------------------------------------------------|
| 30 - 39     | 1009.4981 | 1008.4908 | 1008.5492 | -0.0583 | 0    | R.LLGAPVPVDE.N (Ions score 20)                     |
| 30 - 39     | 1009.5210 | 1008.5137 | 1008.5492 | -0.0354 | 0    | R.LLGAPVPVDE.N (Ions score 23)                     |
| 30 - 42     | 684.3103  | 1366.6060 | 1366.6616 | -0.0556 | 1    | R.LLGAPVPVDENDE.G (Ions score 43)                  |
| 30 - 42     | 684.3447  | 1366.6748 | 1366.6616 | 0.0132  | 1    | R.LLGAPVPVDENDE.G (Ions score 54)                  |
| 30 - 42     | 684.3516  | 1366.6886 | 1366.6616 | 0.0270  | 1    | R.LLGAPVPVDENDE.G (Ions score 17)                  |
| 47 - 54     | 880.4014  | 879.3941  | 879.4160  | -0.0219 | 0    | R.ALQFAMAE.Y (Ions score 14)                       |
| 47 - 57     | 657.2937  | 1312.5728 | 1312.6234 | -0.0505 | 1    | R.ALQFAMAEYNR.A (Ions score 31)                    |
| 47 - 57     | 657.3157  | 1312.6168 | 1312.6234 | -0.0065 | 1    | R.ALQFAMAEYNR.A (Ions score 52)                    |
| 47 - 57     | 657.3157  | 1312.6168 | 1312.6234 | -0.0065 | 1    | R.ALQFAMAEYNR.A (Ions score 57)                    |
| 76 - 88     | 797.9250  | 1593.8354 | 1593.8766 | -0.0412 | 0    | R.QLVSGIKYILQVE.I ICPL_0 (K) (Ions score 28)       |
| 76 - 88     | 797.9502  | 1593.8858 | 1593.8766 | 0.0092  | 0    | R.QLVSGIKYILQVE.I ICPL_0 (K) (Ions score 6)        |
| 76 - 88     | 797.9725  | 1593.9304 | 1593.8766 | 0.0538  | 0    | R.QLVSGIKYILQVE.I ICPL_0 (K) (Ions score 38)       |
| 76 - 88     | 798.0048  | 1593.9950 | 1593.8766 | 0.1184  | 0    | R.QLVSGIKYILQVE.I ICPL_0 (K) (Ions score 53)       |
| 76 - 88     | 532.5421  | 1594.6045 | 1593.8766 | 0.7278  | 0    | R.QLVSGIKYILQVE.I ICPL_0 (K) (Ions score 34)       |
| 76 - 88     | 532.5421  | 1594.6045 | 1593.8766 | 0.7278  | 0    | R.QLVSGIKYILQVE.I ICPL_0 (K) (Ions score 32)       |
| 92 - 105    | 837.8532  | 1673.6918 | 1673.6662 | 0.0257  | 0    | R.TTCPKSSGDLQSCF ICPL_0 (K) (Ions score 49)        |
| 92 - 105    | 837.8622  | 1673.7098 | 1673.6662 | 0.0437  | 0    | R.TTCPKSSGDLQSCF ICPL_0 (K) (Ions score 57)        |
| 92 - 105    | 837.8964  | 1673.7782 | 1673.6662 | 0.1121  | 0    | R.TTCPKSSGDLQSCF ICPL_0 (K) (Ions score 47)        |
| 92 - 105    | 840.8700  | 1679.7254 | 1679.6863 | 0.0392  | 0    | R.TTCPKSSGDLQSCF ICPL_6 (K) (Ions score 30)        |
| 92 - 111    | 1214.9326 | 2427.8506 | 2427.9584 | -0.1077 | 1    | R.TTCPKSSGDLQSCFEHDEP.E ICPL_0 (K) (Ions score 48) |
| 92 - 111    | 1215.0903 | 2428.1660 | 2427.9584 | 0.2077  | 1    | R.TTCPKSSGDLQSCFEHDEP.E ICPL_0 (K) (Ions score 30) |
| 92 - 111    | 1215.0903 | 2428.1660 | 2427.9584 | 0.2077  | 1    | R.TTCPKSSGDLQSCFEHDEP.E ICPL_0 (K) (Ions score 30) |
| 92 - 111    | 1215.6187 | 2429.2228 | 2427.9584 | 1.2645  | 1    | R.TTCPKSSGDLQSCFEHDEP.E ICPL_0 (K) (Ions score 36) |

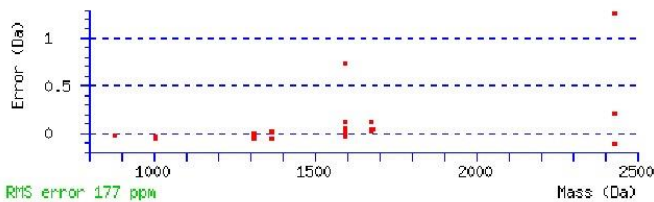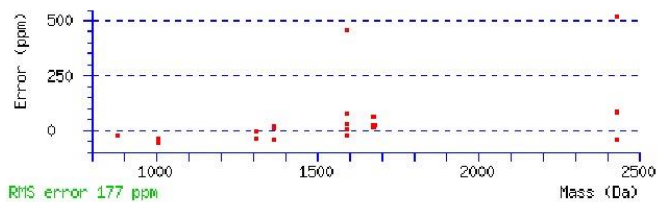

### 3. Ovotransferrin

#### *MATRIX* Mascot Search Results *SCIENCE*

##### Protein View

Match to: **IPI00971372** Score: **597**

Tax\_Id=9031 Gene\_Symbol=TF Ovotransferrin BC type

Nominal mass (M<sub>r</sub>): **79588**; Calculated pI value: **7.08**

NCBI BLAST search of [IPI00971372](#) against nr

Unformatted [sequence string](#) for pasting into other applications

Fixed modifications: Carbamidomethyl (C)

Variable modifications: ICPL\_0 (K), ICPL\_0 (Protein N-term), ICPL\_6 (K), ICPL\_6 (Protein N-term), Oxidation (M)

Cleavage by Trypsin+GluC: cuts C-term side of ER unless next residue is P

Sequence Coverage: **47%**

Matched peptides shown in **Bold Red**

```

1 MKLILCTVLS LGIAAVCFPA PPKSVIRWCT ISSPEEKKCN NLRDLTQQER
51 IALTCVQKAT YLDCIKAIAN NEADAISLDG QVFEAGLAP YKLKFXAAEV
101 YEHTEGSTTS YVAVAVVKKG TEFTVNDLQG KSCHTGLGR SAGWNIPIGT
151 LIHRGAIWEW GIESGSVEQA VAKFFSASCV PGATIEQKLCRQCKGDPKTK
201 CARNAPYSYG SGAFHCLDKG KGDVAFVKHT TVNENAPDQK DEYELLCLDG
251 SRQPVDNYKT CNWARVAAHA VVARDDNKVE DIWSFLSKAQ SDFGVDTKSD
301 FHLFGPPGKK DPVLKDLLFK DSAIMLKRVP SLMDSQLYLC FEYSAIQSM
351 RKDQLTPSPR ENRIQCAVG KDEKSKCDRW SVVSGDVEC TVVDETKDCI
401 IKIMKGEADA VALDGGLVYT AGVCGLVPMV AERYDDESQC SKTDERPASY
451 FAVAVARKDS NVNWNLNKKG KSCHTAVTR AGWVIPMGLI HNRTGTCNFB
501 EYFSEGCAPG SPPNSRLQLC CQSGGIPPE KCVASSHEKY FGYTGALRLC
551 VEKGDVAFIQ HSTVEENTGG KNKADWAKNL QMDFELLCT DGRRANVMDY
601 RECNLAVEPT HAVVVREPEKA NKIRDLLERQ EKRFGVNSE KSKFMFESQ
651 NKDLLFKDLT KCLFKVREGT TYKEFLGDKF YTVISNLKTC NPSDLQMCS
701 FLEGK

```

Show predicted peptides also

Sort Peptides By  Residue Number  Increasing Mass  Decreasing Mass

| Start - End | Observed  | Mr (expt) | Mr (calc) | Delta   | Miss | Sequence                                          |
|-------------|-----------|-----------|-----------|---------|------|---------------------------------------------------|
| 73 - 85     | 661.3840  | 1320.7534 | 1320.6198 | 0.1337  | 0    | E.ADAISLDGGQVFE.A (Ions score 68)                 |
| 73 - 85     | 661.3840  | 1320.7534 | 1320.6198 | 0.1337  | 0    | E.ADAISLDGGQVFE.A (Ions score 57)                 |
| 86 - 99     | 758.3547  | 1514.6948 | 1513.8293 | 0.8656  | 0    | E.AGLAPYKLPFAAE.V (Ions score 6)                  |
| 86 - 99     | 826.4892  | 1650.9638 | 1650.8769 | 0.0869  | 0    | E.AGLAPYKLPFAAE.V 2 ICPL_0 (K) (Ions score 20)    |
| 86 - 99     | 826.4892  | 1650.9638 | 1650.8769 | 0.0869  | 0    | E.AGLAPYKLPFAAE.V 2 ICPL_0 (K) (Ions score 24)    |
| 86 - 99     | 832.4687  | 1662.9228 | 1662.9172 | 0.0057  | 0    | E.AGLAPYKLPFAAE.V 2 ICPL_6 (K) (Ions score 20)    |
| 86 - 99     | 832.4804  | 1662.9462 | 1662.9172 | 0.0291  | 0    | E.AGLAPYKLPFAAE.V 2 ICPL_6 (K) (Ions score 9)     |
| 86 - 99     | 832.4930  | 1662.9714 | 1662.9172 | 0.0543  | 0    | E.AGLAPYKLPFAAE.V 2 ICPL_6 (K) (Ions score 15)    |
| 86 - 102    | 972.3392  | 1942.6638 | 1943.0499 | -0.3861 | 1    | E.AGLAPYKLPFAAEVYE.H ICPL_6 (K) (Ions score 20)   |
| 86 - 102    | 1022.0112 | 2042.0078 | 2042.0513 | -0.0434 | 1    | E.AGLAPYKLPFAAEVYE.H 2 ICPL_0 (K) (Ions score 36) |
| 86 - 102    | 1022.0112 | 2042.0078 | 2042.0513 | -0.0434 | 1    | E.AGLAPYKLPFAAEVYE.H 2 ICPL_0 (K) (Ions score 23) |
| 86 - 102    | 1022.0167 | 2042.0188 | 2042.0513 | -0.0324 | 1    | E.AGLAPYKLPFAAEVYE.H 2 ICPL_0 (K) (Ions score 43) |
| 86 - 102    | 681.6990  | 2042.0752 | 2042.0513 | 0.0239  | 1    | E.AGLAPYKLPFAAEVYE.H 2 ICPL_0 (K) (Ions score 18) |
| 86 - 102    | 1027.9861 | 2053.9576 | 2054.0915 | -0.1339 | 1    | E.AGLAPYKLPFAAEVYE.H 2 ICPL_6 (K) (Ions score 39) |
| 86 - 102    | 685.6679  | 2053.9819 | 2054.0915 | -0.1097 | 1    | E.AGLAPYKLPFAAEVYE.H 2 ICPL_6 (K) (Ions score 20) |
| 86 - 102    | 685.8172  | 2054.4298 | 2054.0915 | 0.3383  | 1    | E.AGLAPYKLPFAAEVYE.H 2 ICPL_6 (K) (Ions score 18) |
| 123 - 140   | 699.2996  | 2094.8770 | 2094.9906 | -0.1136 | 0    | E.FTVNDLQKTSCHTGLGR.S ICPL_0 (K) (Ions score 28)  |
| 123 - 140   | 1048.4458 | 2094.8770 | 2094.9906 | -0.1135 | 0    | E.FTVNDLQKTSCHTGLGR.S ICPL_0 (K) (Ions score 20)  |
| 123 - 140   | 699.3319  | 2094.9739 | 2094.9906 | -0.0167 | 0    | E.FTVNDLQKTSCHTGLGR.S ICPL_0 (K) (Ions score 17)  |
| 123 - 140   | 1048.5651 | 2095.1156 | 2094.9906 | 0.1251  | 0    | E.FTVNDLQKTSCHTGLGR.S ICPL_0 (K) (Ions score 39)  |
| 141 - 154   | 767.7754  | 1533.5362 | 1533.8416 | -0.3053 | 0    | R.SAGWNIPIGTLIHR.G (Ions score 10)                |
| 141 - 154   | 512.2477  | 1533.7213 | 1533.8416 | -0.1203 | 0    | R.SAGWNIPIGTLIHR.G (Ions score 36)                |
| 141 - 154   | 512.2501  | 1533.7285 | 1533.8416 | -0.1131 | 0    | R.SAGWNIPIGTLIHR.G (Ions score 42)                |
| 141 - 154   | 767.8876  | 1533.7606 | 1533.8416 | -0.0809 | 0    | R.SAGWNIPIGTLIHR.G (Ions score 41)                |
| 141 - 154   | 512.2656  | 1533.7750 | 1533.8416 | -0.0666 | 0    | R.SAGWNIPIGTLIHR.G (Ions score 47)                |
| 141 - 154   | 512.2704  | 1533.7894 | 1533.8416 | -0.0522 | 0    | R.SAGWNIPIGTLIHR.G (Ions score 45)                |
| 141 - 154   | 767.9356  | 1533.8566 | 1533.8416 | 0.0151  | 0    | R.SAGWNIPIGTLIHR.G (Ions score 26)                |
| 141 - 154   | 767.9363  | 1533.8580 | 1533.8416 | 0.0165  | 0    | R.SAGWNIPIGTLIHR.G (Ions score 20)                |
| 141 - 154   | 767.9382  | 1533.8618 | 1533.8416 | 0.0203  | 0    | R.SAGWNIPIGTLIHR.G (Ions score 18)                |
| 141 - 154   | 767.9824  | 1533.9502 | 1533.8416 | 0.1087  | 0    | R.SAGWNIPIGTLIHR.G (Ions score 22)                |
| 141 - 154   | 512.3241  | 1533.9505 | 1533.8416 | 0.1089  | 0    | R.SAGWNIPIGTLIHR.G (Ions score 36)                |
| 141 - 154   | 768.0103  | 1534.0060 | 1533.8416 | 0.1645  | 0    | R.SAGWNIPIGTLIHR.G (Ions score 17)                |
| 169 - 186   | 994.4669  | 1986.9192 | 1986.9510 | -0.0317 | 0    | E.QAVAKFFSASCVPGATIE.Q ICPL_0 (K) (Ions score 19) |
| 169 - 186   | 994.4710  | 1986.9274 | 1986.9510 | -0.0235 | 0    | E.QAVAKFFSASCVPGATIE.Q ICPL_0 (K) (Ions score 26) |
| 169 - 186   | 994.5040  | 1986.9934 | 1986.9510 | 0.0425  | 0    | E.QAVAKFFSASCVPGATIE.Q ICPL_0 (K) (Ions score 7)  |
| 169 - 186   | 994.9605  | 1987.9064 | 1986.9510 | 0.9555  | 0    | E.QAVAKFFSASCVPGATIE.Q ICPL_0 (K) (Ions score 22) |
| 169 - 186   | 997.4596  | 1992.9046 | 1992.9711 | -0.0664 | 0    | E.QAVAKFFSASCVPGATIE.Q ICPL_6 (K) (Ions score 32) |
| 169 - 186   | 997.4596  | 1992.9046 | 1992.9711 | -0.0664 | 0    | E.QAVAKFFSASCVPGATIE.Q ICPL_6 (K) (Ions score 31) |
| 192 - 203   | 882.3409  | 1762.6672 | 1762.7668 | -0.0996 | 0    | R.QCKGDPKTKCAR.N 3 ICPL_0 (K) (Ions score 31)     |
| 192 - 203   | 882.3843  | 1762.7540 | 1762.7668 | -0.0128 | 0    | R.QCKGDPKTKCAR.N 3 ICPL_0 (K) (Ions score 10)     |
| 192 - 203   | 891.4439  | 1780.8732 | 1780.8272 | 0.0461  | 0    | R.QCKGDPKTKCAR.N 3 ICPL_6 (K) (Ions score 18)     |
| 192 - 203   | 891.4439  | 1780.8732 | 1780.8272 | 0.0461  | 0    | R.QCKGDPKTKCAR.N 3 ICPL_6 (K) (Ions score 19)     |
| 192 - 203   | 594.6317  | 1780.8733 | 1780.8272 | 0.0461  | 0    | R.QCKGDPKTKCAR.N 3 ICPL_6 (K) (Ions score 11)     |
| 245 - 252   | 467.1296  | 932.2446  | 932.4749  | -0.2303 | 0    | E.LLCLDGSR.Q (Ions score 41)                      |
| 245 - 252   | 467.1296  | 932.2446  | 932.4749  | -0.2303 | 0    | E.LLCLDGSR.Q (Ions score 41)                      |
| 245 - 252   | 467.1613  | 932.3080  | 932.4749  | -0.1669 | 0    | E.LLCLDGSR.Q (Ions score 32)                      |

|           |           |           |           |         |   |                                          |                             |                 |
|-----------|-----------|-----------|-----------|---------|---|------------------------------------------|-----------------------------|-----------------|
| 253 - 265 | 878.8745  | 1755.7344 | 1755.7787 | -0.0443 | 0 | R.QPVDNYKTCNWAR.V                        | ICPL_0 (K)                  | (Ions score 19) |
| 253 - 265 | 586.2521  | 1755.7345 | 1755.7787 | -0.0443 | 0 | R.QPVDNYKTCNWAR.V                        | ICPL_0 (K)                  | (Ions score 16) |
| 253 - 265 | 586.5616  | 1756.6630 | 1755.7787 | 0.8842  | 0 | R.QPVDNYKTCNWAR.V                        | ICPL_0 (K)                  | (Ions score 18) |
| 253 - 265 | 586.5952  | 1756.7638 | 1755.7787 | 0.9850  | 0 | R.QPVDNYKTCNWAR.V                        | ICPL_0 (K)                  | (Ions score 24) |
| 253 - 265 | 586.5952  | 1756.7638 | 1755.7787 | 0.9850  | 0 | R.QPVDNYKTCNWAR.V                        | ICPL_0 (K)                  | (Ions score 23) |
| 253 - 265 | 881.9121  | 1761.8096 | 1761.7989 | 0.0108  | 0 | R.QPVDNYKTCNWAR.V                        | ICPL_6 (K)                  | (Ions score 51) |
| 253 - 265 | 881.9121  | 1761.8096 | 1761.7989 | 0.0108  | 0 | R.QPVDNYKTCNWAR.V                        | ICPL_6 (K)                  | (Ions score 52) |
| 329 - 342 | 799.9117  | 1597.8088 | 1597.7698 | 0.0391  | 0 | R.VPSLMSQLYLGF.E.Y                       |                             | (Ions score 46) |
| 329 - 342 | 799.9222  | 1597.8298 | 1597.7698 | 0.0601  | 0 | R.VPSLMSQLYLGF.E.Y                       |                             | (Ions score 31) |
| 329 - 342 | 799.9239  | 1597.8332 | 1597.7698 | 0.0635  | 0 | R.VPSLMSQLYLGF.E.Y                       |                             | (Ions score 47) |
| 343 - 351 | 559.6952  | 1117.3758 | 1117.5226 | -0.1467 | 0 | E.YYSAIQSMR.K                            |                             | (Ions score 46) |
| 343 - 351 | 559.7082  | 1117.4018 | 1117.5226 | -0.1208 | 0 | E.YYSAIQSMR.K                            |                             | (Ions score 49) |
| 352 - 360 | 573.7278  | 1145.4410 | 1145.5829 | -0.1419 | 0 | R.KDQLTPSPR.E                            | ICPL_0 (K)                  | (Ions score 49) |
| 352 - 360 | 573.7511  | 1145.4876 | 1145.5829 | -0.0953 | 0 | R.KDQLTPSPR.E                            | ICPL_0 (K)                  | (Ions score 40) |
| 352 - 360 | 573.7511  | 1145.4876 | 1145.5829 | -0.0953 | 0 | R.KDQLTPSPR.E                            | ICPL_0 (K)                  | (Ions score 49) |
| 352 - 360 | 573.7637  | 1145.5128 | 1145.5829 | -0.0701 | 0 | R.KDQLTPSPR.E                            | ICPL_0 (K)                  | (Ions score 44) |
| 352 - 360 | 573.7697  | 1145.5248 | 1145.5829 | -0.0581 | 0 | R.KDQLTPSPR.E                            | ICPL_0 (K)                  | (Ions score 46) |
| 352 - 360 | 576.7552  | 1151.4958 | 1151.6030 | -0.1072 | 0 | R.KDQLTPSPR.E                            | ICPL_6 (K)                  | (Ions score 56) |
| 352 - 360 | 576.7864  | 1151.5582 | 1151.6030 | -0.0448 | 0 | R.KDQLTPSPR.E                            | ICPL_6 (K)                  | (Ions score 50) |
| 364 - 373 | 658.8079  | 1315.6012 | 1315.5963 | 0.0050  | 0 | R.IQWCAVGKDE.K                           | ICPL_6 (K)                  | (Ions score 26) |
| 364 - 373 | 658.8079  | 1315.6012 | 1315.5963 | 0.0050  | 0 | R.IQWCAVGKDE.K                           | ICPL_6 (K)                  | (Ions score 18) |
| 364 - 373 | 658.8334  | 1315.6522 | 1315.5963 | 0.0560  | 0 | R.IQWCAVGKDE.K                           | ICPL_6 (K)                  | (Ions score 16) |
| 380 - 395 | 897.8936  | 1793.7726 | 1793.7778 | -0.0052 | 1 | R.WSVVSNQDVECTVDE.T                      |                             | (Ions score 16) |
| 380 - 395 | 898.4433  | 1794.8720 | 1793.7778 | 1.0942  | 1 | R.WSVVSNQDVECTVDE.T                      |                             | (Ions score 26) |
| 390 - 407 | 1178.0666 | 2354.1186 | 2354.1052 | 0.0134  | 1 | E.CTVVDETKDCIIKIMKGE.A                   | ICPL_0 (K); ICPL_6 (K)      | (Ions score 9)  |
| 396 - 407 | 584.2266  | 1749.6580 | 1749.8218 | -0.1639 | 0 | E.IKDCIIKIMKGE.A                         | 3 ICPL_0 (K)                | (Ions score 29) |
| 396 - 407 | 584.3337  | 1749.9793 | 1749.8218 | 0.1574  | 0 | E.TKDCIIKIMKGE.A                         | 3 ICPL_0 (K)                | (Ions score 41) |
| 396 - 432 | 1368.3469 | 4102.0189 | 4102.0326 | -0.0138 | 1 | E.TKDCIIKIMKGEADAVLDGGLVYTAGVCGLVPMVAE.R | 2 ICPL_6 (K); Oxidation (M) | (Ions score 11) |
| 438 - 457 | 783.7053  | 2348.0941 | 2347.1015 | 0.9926  | 1 | E.SQCSKTDERPASYFAVAR.K                   | ICPL_0 (K)                  | (Ions score 24) |
| 438 - 457 | 783.7053  | 2348.0941 | 2347.1015 | 0.9926  | 1 | E.SQCSKTDERPASYFAVAR.K                   | ICPL_0 (K)                  | (Ions score 29) |
| 458 - 479 | 986.4173  | 2956.2301 | 2956.4381 | -0.2080 | 0 | R.KDSNVNWNLLGKKSCHTAVGR.T                | 4 ICPL_6 (K)                | (Ions score 66) |
| 458 - 479 | 986.5812  | 2956.7218 | 2956.4381 | 0.2837  | 0 | R.KDSNVNWNLLGKKSCHTAVGR.T                | 4 ICPL_6 (K)                | (Ions score 33) |
| 494 - 505 | 735.2555  | 1468.4964 | 1468.5453 | -0.0488 | 1 | R.TGTCNFDEYFSE.G                         |                             | (Ions score 18) |
| 494 - 505 | 735.2815  | 1468.5484 | 1468.5453 | 0.0032  | 1 | R.TGTCNFDEYFSE.G                         |                             | (Ions score 33) |
| 494 - 505 | 735.3012  | 1468.5878 | 1468.5453 | 0.0426  | 1 | R.TGTCNFDEYFSE.G                         |                             | (Ions score 30) |
| 517 - 538 | 840.3527  | 2518.0363 | 2518.1039 | -0.0677 | 1 | R.LCQLCQSGGIPPEKCVASSHE.K                | ICPL_0 (K)                  | (Ions score 30) |
| 517 - 538 | 842.3937  | 2524.1593 | 2524.1241 | 0.0352  | 1 | R.LCQLCQSGGIPPEKCVASSHE.K                | ICPL_6 (K)                  | (Ions score 13) |
| 517 - 538 | 842.3937  | 2524.1593 | 2524.1241 | 0.0352  | 1 | R.LCQLCQSGGIPPEKCVASSHE.K                | ICPL_6 (K)                  | (Ions score 28) |
| 539 - 548 | 640.8276  | 1279.6406 | 1279.6349 | 0.0057  | 0 | E.KYFGYTGALR.C                           | ICPL_0 (K)                  | (Ions score 43) |
| 539 - 548 | 640.8290  | 1279.6434 | 1279.6349 | 0.0085  | 0 | E.KYFGYTGALR.C                           | ICPL_0 (K)                  | (Ions score 12) |
| 539 - 548 | 640.8581  | 1279.7016 | 1279.6349 | 0.0667  | 0 | E.KYFGYTGALR.C                           | ICPL_0 (K)                  | (Ions score 43) |
| 539 - 548 | 640.8581  | 1279.7016 | 1279.6349 | 0.0667  | 0 | E.KYFGYTGALR.C                           | ICPL_0 (K)                  | (Ions score 46) |
| 539 - 548 | 640.9522  | 1279.8998 | 1279.6349 | 0.2549  | 0 | E.KYFGYTGALR.C                           | ICPL_0 (K)                  | (Ions score 13) |
| 539 - 548 | 643.8466  | 1285.6786 | 1285.6551 | 0.0236  | 0 | E.KYFGYTGALR.C                           | ICPL_6 (K)                  | (Ions score 8)  |
| 539 - 552 | 559.9263  | 1676.7571 | 1675.8392 | 0.9179  | 1 | E.KYFGYTGALRCLVE.K                       |                             | (Ions score 12) |
| 567 - 586 | 866.7033  | 2597.0881 | 2596.1077 | 0.9803  | 0 | E.NTGGKNKADWAKNLQDDFE.L                  | 3 ICPL_0 (K)                | (Ions score 15) |
| 567 - 586 | 866.7033  | 2597.0881 | 2596.1077 | 0.9803  | 0 | E.NTGGKNKADWAKNLQDDFE.L                  | 3 ICPL_0 (K)                | (Ions score 54) |
| 567 - 586 | 872.3646  | 2614.0720 | 2614.1681 | -0.0961 | 0 | E.NTGGKNKADWAKNLQDDFE.L                  | 3 ICPL_6 (K)                | (Ions score 34) |
| 567 - 586 | 872.3646  | 2614.0720 | 2614.1681 | -0.0961 | 0 | E.NTGGKNKADWAKNLQDDFE.L                  | 3 ICPL_6 (K)                | (Ions score 10) |
| 608 - 618 | 602.3203  | 1202.6260 | 1202.6772 | -0.0511 | 0 | E.VPTHAVVVRE.K                           |                             | (Ions score 54) |
| 641 - 648 | 629.2952  | 1256.5758 | 1256.5358 | 0.0400  | 0 | E.KSKFMMFE.S                             | 2 ICPL_0 (K)                | (Ions score 31) |
| 641 - 648 | 629.2952  | 1256.5758 | 1256.5358 | 0.0400  | 0 | E.KSKFMMFE.S                             | 2 ICPL_0 (K)                | (Ions score 25) |
| 641 - 648 | 635.2760  | 1268.5374 | 1268.5761 | -0.0386 | 0 | E.KSKFMMFE.S                             | 2 ICPL_6 (K)                | (Ions score 18) |

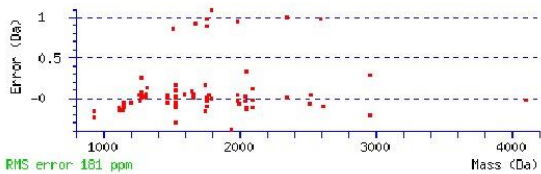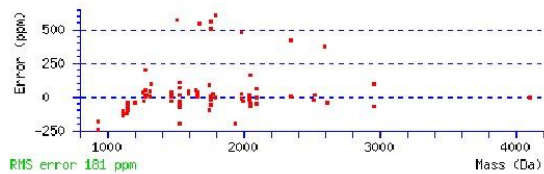

## 4. Purpurin

### *MATRIX* SCIENCE Mascot Search Results

#### Protein View

Match to: **IPI00600469** Score: **596**

Tax\_Id=9031 Gene\_Symbol=LOC396454 Purpurin

Nominal mass (M<sub>r</sub>): **22250**; Calculated pI value: **4.77**

NCBI BLAST search of [IPI00600469](#) against nr

Unformatted [sequence string](#) for pasting into other applications

Fixed modifications: Carbamidomethyl (C)

Variable modifications: ICPL\_0 (K),ICPL\_0 (Protein N-term),ICPL\_6 (K),ICPL\_6 (Protein N-term),Oxidation (M)

Cleavage by Trypsin+GluC: cuts C-term side of ER unless next residue is P

Sequence Coverage: **34%**

Matched peptides shown in **Bold Red**

1 MKYAQYVFLA SIFSAVEYSL AQTCAVDSFS VKDNFDPKRY **AGKWYALAKK**  
51 **DPEGLFLQDN ISAE**YTVBED GTMTASSKGR VKLFGFWVIC ADMAAQYTPV  
101 DPTTPAKMYM TYQGLASYLS SGGDNYWVID TDYDNYAITY **ACRSLKEDGS**  
151 **CDDGYSLIFS RNPRGLPPAI QR**IVRQKQEE **ICMSGQFPV LQSGAC**

Show predicted peptides also

Sort Peptides By  Residue Number  Increasing Mass  Decreasing Mass

| Start - End | Observed  | Mr (expt) | Mr (calc) | Delta   | Miss | Sequence                                                             |
|-------------|-----------|-----------|-----------|---------|------|----------------------------------------------------------------------|
| 40 - 53     | 977.9780  | 1953.9414 | 1953.9050 | 0.0365  | 0    | R.YAGKWYALAKKDPE.G 3 ICPL_0 (K) ( <a href="#">Ions score 38</a> )    |
| 40 - 53     | 977.9780  | 1953.9414 | 1953.9050 | 0.0365  | 0    | R.YAGKWYALAKKDPE.G 3 ICPL_0 (K) ( <a href="#">Ions score 41</a> )    |
| 40 - 53     | 652.3443  | 1954.0111 | 1953.9050 | 0.1061  | 0    | R.YAGKWYALAKKDPE.G 3 ICPL_0 (K) ( <a href="#">Ions score 12</a> )    |
| 40 - 53     | 652.3443  | 1954.0111 | 1953.9050 | 0.1061  | 0    | R.YAGKWYALAKKDPE.G 3 ICPL_0 (K) ( <a href="#">Ions score 15</a> )    |
| 40 - 53     | 652.3447  | 1954.0123 | 1953.9050 | 0.1073  | 0    | R.YAGKWYALAKKDPE.G 3 ICPL_0 (K) ( <a href="#">Ions score 11</a> )    |
| 40 - 53     | 986.9757  | 1971.9368 | 1971.9653 | -0.0285 | 0    | R.YAGKWYALAKKDPE.G 3 ICPL_6 (K) ( <a href="#">Ions score 38</a> )    |
| 40 - 53     | 986.9757  | 1971.9368 | 1971.9653 | -0.0285 | 0    | R.YAGKWYALAKKDPE.G 3 ICPL_6 (K) ( <a href="#">Ions score 48</a> )    |
| 40 - 53     | 658.3288  | 1971.9646 | 1971.9653 | -0.0008 | 0    | R.YAGKWYALAKKDPE.G 3 ICPL_6 (K) ( <a href="#">Ions score 13</a> )    |
| 40 - 53     | 658.3288  | 1971.9646 | 1971.9653 | -0.0008 | 0    | R.YAGKWYALAKKDPE.G 3 ICPL_6 (K) ( <a href="#">Ions score 14</a> )    |
| 54 - 64     | 603.7847  | 1205.5548 | 1205.5928 | -0.0380 | 0    | E.GLFLQDNISAE.Y ( <a href="#">Ions score 66</a> )                    |
| 54 - 64     | 603.7847  | 1205.5548 | 1205.5928 | -0.0380 | 0    | E.GLFLQDNISAE.Y ( <a href="#">Ions score 54</a> )                    |
| 54 - 64     | 603.7939  | 1205.5732 | 1205.5928 | -0.0196 | 0    | E.GLFLQDNISAE.Y ( <a href="#">Ions score 9</a> )                     |
| 144 - 161   | 683.6235  | 2047.8487 | 2047.9157 | -0.0670 | 1    | R.SLKEDGSCDDGYSLIFSR.N ( <a href="#">Ions score 17</a> )             |
| 144 - 161   | 1024.9317 | 2047.8488 | 2047.9157 | -0.0668 | 1    | R.SLKEDGSCDDGYSLIFSR.N ( <a href="#">Ions score 69</a> )             |
| 144 - 161   | 1024.9459 | 2047.8772 | 2047.9157 | -0.0384 | 1    | R.SLKEDGSCDDGYSLIFSR.N ( <a href="#">Ions score 79</a> )             |
| 144 - 161   | 1024.9825 | 2047.9504 | 2047.9157 | 0.0348  | 1    | R.SLKEDGSCDDGYSLIFSR.N ( <a href="#">Ions score 94</a> )             |
| 144 - 161   | 718.6648  | 2152.9726 | 2152.9371 | 0.0354  | 1    | R.SLKEDGSCDDGYSLIFSR.N ICPL_0 (K) ( <a href="#">Ions score 24</a> )  |
| 144 - 161   | 718.6691  | 2152.9855 | 2152.9371 | 0.0483  | 1    | R.SLKEDGSCDDGYSLIFSR.N ICPL_0 (K) ( <a href="#">Ions score 38</a> )  |
| 144 - 161   | 718.6704  | 2152.9894 | 2152.9371 | 0.0522  | 1    | R.SLKEDGSCDDGYSLIFSR.N ICPL_0 (K) ( <a href="#">Ions score 41</a> )  |
| 144 - 161   | 718.6704  | 2152.9894 | 2152.9371 | 0.0522  | 1    | R.SLKEDGSCDDGYSLIFSR.N ICPL_0 (K) ( <a href="#">Ions score 29</a> )  |
| 144 - 161   | 1077.5355 | 2153.0564 | 2152.9371 | 0.1193  | 1    | R.SLKEDGSCDDGYSLIFSR.N ICPL_0 (K) ( <a href="#">Ions score 105</a> ) |
| 144 - 161   | 1077.5355 | 2153.0564 | 2152.9371 | 0.1193  | 1    | R.SLKEDGSCDDGYSLIFSR.N ICPL_0 (K) ( <a href="#">Ions score 92</a> )  |
| 144 - 161   | 720.7387  | 2159.1943 | 2158.9573 | 0.2370  | 1    | R.SLKEDGSCDDGYSLIFSR.N ICPL_6 (K) ( <a href="#">Ions score 10</a> )  |
| 148 - 161   | 796.3584  | 1590.7022 | 1590.6620 | 0.0402  | 0    | E.DGSCDDGYSLIFSR.N ( <a href="#">Ions score 71</a> )                 |
| 148 - 161   | 796.3584  | 1590.7022 | 1590.6620 | 0.0402  | 0    | E.DGSCDDGYSLIFSR.N ( <a href="#">Ions score 86</a> )                 |
| 148 - 161   | 796.3585  | 1590.7024 | 1590.6620 | 0.0404  | 0    | E.DGSCDDGYSLIFSR.N ( <a href="#">Ions score 74</a> )                 |
| 165 - 172   | 426.1552  | 850.2958  | 850.5025  | -0.2066 | 0    | R.GLPPAIQR.I ( <a href="#">Ions score 29</a> )                       |
| 165 - 172   | 426.1568  | 850.2990  | 850.5025  | -0.2034 | 0    | R.GLPPAIQR.I ( <a href="#">Ions score 28</a> )                       |
| 165 - 172   | 426.1568  | 850.2990  | 850.5025  | -0.2034 | 0    | R.GLPPAIQR.I ( <a href="#">Ions score 25</a> )                       |
| 181 - 196   | 891.9078  | 1781.8010 | 1781.7899 | 0.0111  | 0    | E.ICMSGQFPVLQSGAC.- ( <a href="#">Ions score 52</a> )                |
| 181 - 196   | 891.9158  | 1781.8170 | 1781.7899 | 0.0271  | 0    | E.ICMSGQFPVLQSGAC.- ( <a href="#">Ions score 43</a> )                |
| 181 - 196   | 891.9460  | 1781.8774 | 1781.7899 | 0.0875  | 0    | E.ICMSGQFPVLQSGAC.- ( <a href="#">Ions score 25</a> )                |
| 181 - 196   | 891.9566  | 1781.8986 | 1781.7899 | 0.1087  | 0    | E.ICMSGQFPVLQSGAC.- ( <a href="#">Ions score 52</a> )                |
| 181 - 196   | 891.9623  | 1781.9100 | 1781.7899 | 0.1201  | 0    | E.ICMSGQFPVLQSGAC.- ( <a href="#">Ions score 25</a> )                |
| 181 - 196   | 891.9653  | 1781.9160 | 1781.7899 | 0.1261  | 0    | E.ICMSGQFPVLQSGAC.- ( <a href="#">Ions score 32</a> )                |
| 181 - 196   | 891.9783  | 1781.9420 | 1781.7899 | 0.1521  | 0    | E.ICMSGQFPVLQSGAC.- ( <a href="#">Ions score 19</a> )                |
| 181 - 196   | 891.9783  | 1781.9420 | 1781.7899 | 0.1521  | 0    | E.ICMSGQFPVLQSGAC.- ( <a href="#">Ions score 12</a> )                |

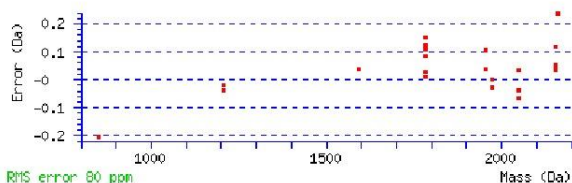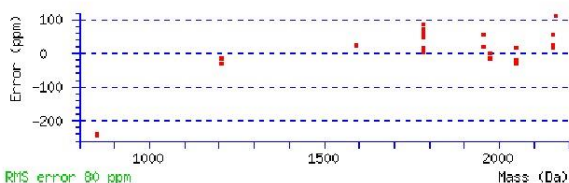

Supplement: 41598_2017_12650_MOESM1_ESM.pdf [file 41598_2017_12650_MOESM1_ESM.pdf]
